# Supplementary material
Source: PubMed Central journal article supplement (PMC3351826)
Supplement: supp_M019570_jlr.M019570-1.pdf [file supp_M019570_jlr.M019570-1.pdf]

**SUPPLEMENTAL TABLE 1. Effects of torcetrapib on non-fasting concentrations of apoB<sup>a</sup>**

| Parameter and Study Phase | Torcetrapib Alone        |                          | Atorvastatin + Torcetrapib |
|---------------------------|--------------------------|--------------------------|----------------------------|
|                           | 120 mg QD<br>(n = 9)     | 120 mg BID<br>(n = 6)    | 120 mg QD<br>(n = 9)       |
| Plasma total apoB, mg/dl  |                          |                          |                            |
| Placebo                   | 98.6 ± 6.1               | 103.2 ± 7.8              | 74.6 ± 5.3 <sup>h</sup>    |
| Torcetrapib               | 85.7 ± 4.8 <sup>c</sup>  | 81.5 ± 8.1 <sup>c</sup>  | 62.6 ± 3.6 <sup>e,h</sup>  |
| Change (%)                | -12 ± 5                  | -21 ± 5                  | -15 ± 3                    |
| TRL apoB-100, mg/dl       |                          |                          |                            |
| Placebo                   | 9.5 ± 0.9                | 9.5 ± 1.4                | 6.9 ± 0.7 <sup>g</sup>     |
| Torcetrapib               | 6.7 ± 0.5 <sup>d</sup>   | 6.9 ± 0.9 <sup>c</sup>   | 5.2 ± 0.5 <sup>d,f</sup>   |
| Change (%)                | -23 ± 10                 | -24 ± 7                  | -22 ± 8                    |
| IDL apoB-100, mg/dl       |                          |                          |                            |
| Placebo                   | 2.3 ± 0.4                | 2.7 ± 0.5                | 1.8 ± 0.2                  |
| Torcetrapib               | 1.4 ± 0.3 <sup>b</sup>   | 0.9 ± 0.1 <sup>c</sup>   | 1.2 ± 0.1 <sup>d</sup>     |
| Change (%)                | -29 ± 16                 | -57 ± 14                 | -29 ± 5                    |
| LDL apoB-100, mg/dl       |                          |                          |                            |
| Placebo                   | 86.8 ± 5.5               | 91.0 ± 6.4               | 67.0 ± 5.0 <sup>g</sup>    |
| Torcetrapib               | 77.4 ± 4.5               | 74.3 ± 7.4 <sup>c</sup>  | 57.1 ± 3.6 <sup>d,h</sup>  |
| Change (%)                | -9 ± 5                   | -18 ± 5                  | -14 ± 3                    |
| TRL apoB-48, mg/dl        |                          |                          |                            |
| Placebo                   | 0.47 ± 0.10              | 0.57 ± 0.15              | 0.19 ± 0.04 <sup>g</sup>   |
| Torcetrapib               | 0.23 ± 0.08 <sup>d</sup> | 0.40 ± 0.12 <sup>d</sup> | 0.16 ± 0.04                |
| Change (%)                | -49 ± 9                  | -31 ± 6                  | -2 ± 14                    |

Apo, apolipoprotein; TRL, triglyceride-rich lipoprotein; IDL, intermediate density lipoprotein; QD, once daily; BID, twice daily.

<sup>a</sup>Data are presented as mean  $\pm$  SEM. Significance for comparison of absolute values with placebo phase was determined using a paired *t*-test, with apoB-48 values being log-transformed before statistical analysis. Significance for comparison between torcetrapib alone and atorvastatin+torcetrapib cohorts during placebo and torcetrapib 120 mg once daily phases was tested by a two-independent sample *t*-test.

<sup>b</sup>*P* = 0.05; <sup>c</sup>*P* < 0.05; <sup>d</sup>*P* < 0.01; <sup>e</sup>*P* = 0.001, for comparison with the placebo phase.

<sup>f</sup>*P* = 0.05; <sup>g</sup>*P* < 0.05; <sup>h</sup>*P* < 0.01, for comparison with the torcetrapib 120 mg QD cohort.

**SUPPLEMENTAL TABLE 2. Effects of torcetrapib on non-fasting plasma concentrations of apoA-I and apoA-II<sup>a</sup>**

| Parameter and Study Phase | Torcetrapib Alone        |                          | Atorvastatin + Torcetrapib |
|---------------------------|--------------------------|--------------------------|----------------------------|
|                           | 120 mg QD<br>(n = 9)     | 120 mg BID<br>(n = 6)    | 120 mg QD<br>(n = 9)       |
| ApoA-I, mg/dl             |                          |                          |                            |
| Placebo                   | 95.6 ± 3.6               | 99.6 ± 4.0               | 85.7 ± 5.3                 |
| Torcetrapib               | 110.3 ± 4.7 <sup>d</sup> | 131.7 ± 3.1 <sup>e</sup> | 99.6 ± 7.0 <sup>c</sup>    |
| Change (%)                | 15 ± 2                   | 33 ± 3                   | 16 ± 3                     |
| ApoA-II, mg/dl            |                          |                          |                            |
| Placebo                   | 26.2 ± 1.2               | 27.6 ± 0.8               | 24.7 ± 1.4                 |
| Torcetrapib               | 29.3 ± 1.5 <sup>d</sup>  | 33.8 ± 0.6 <sup>d</sup>  | 27.4 ± 1.5 <sup>b</sup>    |
| Change (%)                | 12 ± 2                   | 23 ± 3                   | 11 ± 4                     |

Apo, apolipoprotein; QD, once daily; BID, twice daily.

<sup>a</sup>Data are presented as mean ± SEM. Significance for comparison of absolute values with placebo phase was determined using a paired *t*-test. Significance for comparison between torcetrapib alone and atorvastatin+torcetrapib cohorts during placebo and torcetrapib 120 mg once daily phases was tested by a two-independent sample *t*-test.

<sup>b</sup>*P* = 0.01; <sup>c</sup>*P* = 0.001; <sup>d</sup>*P* < 0.001; <sup>e</sup>*P* < 0.0001, for comparison with the placebo phase.

**SUPPLEMENTAL TABLE 3. Effects of torcetrapib on non-fasting concentrations of apoE<sup>a</sup>**

| Parameter and Study Phase | Torcetrapib Alone        |                          | Atorvastatin + Torcetrapib |
|---------------------------|--------------------------|--------------------------|----------------------------|
|                           | 120 mg QD<br>(n = 9)     | 120 mg BID<br>(n = 6)    | 120 mg QD<br>(n = 9)       |
| Plasma total apoE, mg/dl  |                          |                          |                            |
| Placebo                   | 6.1 ± 0.7                | 6.4 ± 0.9                | 3.8 ± 0.2 <sup>f</sup>     |
| Torcetrapib               | 4.9 ± 0.6                | 5.4 ± 0.6                | 4.1 ± 0.4                  |
| Change (%)                | -18 ± 9                  | -10 ± 10                 | 8 ± 9                      |
| TRL apoE, mg/dl           |                          |                          |                            |
| Placebo                   | 4.4 ± 0.5                | 4.6 ± 0.7                | 2.0 ± 0.3 <sup>f</sup>     |
| Torcetrapib               | 2.9 ± 0.5 <sup>c</sup>   | 3.4 ± 0.5 <sup>b</sup>   | 2.0 ± 0.3                  |
| Change (%)                | -28 ± 11                 | -21 ± 8                  | 1 ± 10                     |
| IDL apoE, mg/dl           |                          |                          |                            |
| Placebo                   | 0.18 ± 0.02              | 0.20 ± 0.03              | 0.13 ± 0.01                |
| Torcetrapib               | 0.08 ± 0.02 <sup>d</sup> | 0.05 ± 0.01 <sup>d</sup> | 0.06 ± 0.01 <sup>e</sup>   |
| Change (%)                | -53 ± 12                 | -73 ± 5                  | -49 ± 6                    |
| LDL apoE, mg/dl           |                          |                          |                            |
| Placebo                   | 0.15 ± 0.04              | 0.17 ± 0.07              | 0.24 ± 0.05                |
| Torcetrapib               | 0.22 ± 0.08              | 0.27 ± 0.15              | 0.25 ± 0.10                |
| Change (%)                | 170 ± 138                | 143 ± 139                | -8 ± 28                    |
| HDL apoE, mg/dl           |                          |                          |                            |
| Placebo                   | 0.51 ± 0.06              | 0.57 ± 0.09              | 0.71 ± 0.13                |
| Torcetrapib               | 1.05 ± 0.35              | 1.23 ± 0.42              | 1.33 ± 0.40                |
| Change (%)                | 97 ± 47                  | 108 ± 55                 | 84 ± 39                    |

|                     |                        |                          |             |
|---------------------|------------------------|--------------------------|-------------|
| d>1.21 apoE, mg/dl  |                        |                          |             |
| Placebo             | 0.89 ± 0.14            | 0.91 ± 0.20              | 0.70 ± 0.12 |
| Torcetrapib         | 0.60 ± 0.17            | 0.43 ± 0.10 <sup>c</sup> | 0.53 ± 0.11 |
| Change (%)          | -28 ± 16               | -50 ± 10                 | -22 ± 15    |
| TRL apoE / HDL apoE |                        |                          |             |
| Placebo             | 9.9 ± 2.3              | 10.0 ± 3.4               | 4.6 ± 1.7   |
| Torcetrapib         | 4.2 ± 0.8 <sup>c</sup> | 5.7 ± 2.9 <sup>d</sup>   | 2.8 ± 0.8   |
| Change (%)          | -49 ± 10               | -51 ± 9                  | -16 ± 23    |

---

Apo, apolipoprotein; TRL, triglyceride-rich lipoprotein; IDL, intermediate density lipoprotein; QD, once daily; BID, twice daily.

<sup>a</sup>Data are presented as mean ± SEM. Significance for comparison of absolute values with placebo phase was determined using a paired *t*-test. Significance for comparison between torcetrapib alone and atorvastatin+torcetrapib cohorts during placebo and torcetrapib 120 mg once daily phases was tested by a two-independent sample *t*-test.

<sup>b</sup>*P* = 0.05; <sup>c</sup>*P* < 0.05; <sup>d</sup>*P* < 0.01; <sup>e</sup>*P* < 0.001, for comparison with the placebo phase.

<sup>f</sup>*P* < 0.01, for comparison with the torcetrapib 120 mg QD cohort.

**SUPPLEMENTAL TABLE 4. Effects of torcetrapib on the distribution of apoE in lipoprotein particles<sup>a</sup>**

| Parameter and Study Phase | Torcetrapib Alone       |                         | Atorvastatin + Torcetrapib |
|---------------------------|-------------------------|-------------------------|----------------------------|
|                           | 120 mg QD<br>(n = 9)    | 120 mg BID<br>(n = 6)   | 120 mg QD<br>(n = 9)       |
| TRL particles (%)         |                         |                         |                            |
| Placebo                   | 70.0 ± 2.9              | 70.3 ± 3.6              | 52.5 ± 6.3 <sup>e</sup>    |
| Torcetrapib               | 60.5 ± 5.2              | 64.2 ± 8.1              | 50.3 ± 7.6                 |
| Change (%)                | -12 ± 8                 | -9 ± 10                 | -3 ± 11                    |
| IDL particles (%)         |                         |                         |                            |
| Placebo                   | 3.0 ± 0.4               | 3.0 ± 0.4               | 3.4 ± 0.4                  |
| Torcetrapib               | 1.6 ± 0.4 <sup>c</sup>  | 0.9 ± 0.1 <sup>d</sup>  | 1.7 ± 0.4 <sup>d</sup>     |
| Change (%)                | -42 ± 15                | -70 ± 5                 | -51 ± 7                    |
| LDL particles (%)         |                         |                         |                            |
| Placebo                   | 2.8 ± 1.0               | 2.5 ± 0.8               | 6.4 ± 1.3 <sup>e</sup>     |
| Torcetrapib               | 5.0 ± 1.4               | 4.7 ± 2.1               | 5.3 ± 1.4                  |
| Change (%)                | 329 ± 255               | 137 ± 123               | -22 ± 18                   |
| HDL particles (%)         |                         |                         |                            |
| Placebo                   | 9.4 ± 1.5               | 9.8 ± 2.0               | 18.8 ± 3.0 <sup>e</sup>    |
| Torcetrapib               | 21.0 ± 5.2 <sup>b</sup> | 22.4 ± 5.5 <sup>c</sup> | 28.8 ± 5.8                 |
| Change (%)                | 143 ± 52                | 123 ± 42                | 67 ± 26                    |
| d>1.21 plasma (%)         |                         |                         |                            |
| Placebo                   | 14.7 ± 1.4              | 14.4 ± 2.2              | 18.9 ± 3.0                 |
| Torcetrapib               | 11.9 ± 1.9              | 8.5 ± 0.7 <sup>c</sup>  | 14.2 ± 3.9                 |
| Change (%)                | -13 ± 16                | -36 ± 7                 | -27 ± 14                   |

TRL, triglyceride-rich lipoprotein; IDL, intermediate density lipoprotein; QD, once daily; BID, twice daily.

<sup>a</sup>Data are presented as mean  $\pm$  SEM. Significance for comparison of absolute values with placebo phase was determined using a paired *t*-test. Significance for comparison between torcetrapib alone and atorvastatin+torcetrapib cohorts during placebo and torcetrapib 120 mg once daily phases was tested by a two-independent sample *t*-test.

<sup>b</sup>*P* = 0.05; <sup>c</sup>*P* < 0.05; <sup>d</sup>*P* < 0.01, for comparison with the placebo phase.

<sup>e</sup>*P* < 0.05, for comparison with the torcetrapib 120 mg QD cohort.

**SUPPLEMENTAL TABLE 5. Effects of torcetrapib on TRL composition<sup>a</sup>**

| Parameter and Study Phase | Torcetrapib Alone       |                         | Atorvastatin + Torcetrapib |
|---------------------------|-------------------------|-------------------------|----------------------------|
|                           | 120 mg QD<br>(n = 9)    | 120 mg BID<br>(n = 6)   | 120 mg QD<br>(n = 9)       |
| Total cholesterol, mg/dl  |                         |                         |                            |
| Placebo                   | 32.5 ± 3.7              | 35.1 ± 5.7              | 17.3 ± 2.3 <sup>g</sup>    |
| Torcetrapib               | 17.0 ± 2.2 <sup>e</sup> | 20.4 ± 4.6 <sup>d</sup> | 9.8 ± 1.6 <sup>d,f</sup>   |
| Change (%)                | -43 ± 8                 | -41 ± 7                 | -41 ± 8                    |
| Free cholesterol, mg/dl   |                         |                         |                            |
| Placebo                   | 16.6 ± 1.7              | 17.5 ± 2.5              | 9.7 ± 1.3 <sup>g</sup>     |
| Torcetrapib               | 12.9 ± 1.6 <sup>b</sup> | 16.2 ± 3.4              | 7.7 ± 1.4 <sup>f</sup>     |
| Change (%)                | -17 ± 11                | -8 ± 9                  | -18 ± 11                   |
| Cholesteryl ester, mg/dl  |                         |                         |                            |
| Placebo                   | 26.8 ± 3.4              | 29.6 ± 5.4              | 12.7 ± 1.7 <sup>g</sup>    |
| Torcetrapib               | 6.9 ± 1.2 <sup>e</sup>  | 7.0 ± 2.4 <sup>d</sup>  | 3.5 ± 0.4 <sup>d,f</sup>   |
| Change (%)                | -73 ± 3                 | -78 ± 5                 | -69 ± 4                    |
| Triglycerides, mg/dl      |                         |                         |                            |
| Placebo                   | 202.2 ± 24.4            | 207.8 ± 32.3            | 123.4 ± 19.8 <sup>f</sup>  |
| Torcetrapib               | 159.6 ± 23.2            | 199.8 ± 44.7            | 102.6 ± 20.0 <sup>f</sup>  |
| Change (%)                | -17 ± 10                | -6 ± 9                  | -16 ± 12                   |
| Phospholipid, mg/dl       |                         |                         |                            |
| Placebo                   | 52.2 ± 6.1              | 52.2 ± 7.8              | 29.9 ± 4.3 <sup>g</sup>    |
| Torcetrapib               | 34.9 ± 4.7 <sup>d</sup> | 40.7 ± 8.4 <sup>c</sup> | 21.4 ± 3.9 <sup>c,f</sup>  |
| Change (%)                | -28 ± 9                 | -22 ± 7                 | -27 ± 10                   |



|                |            |                         |            |
|----------------|------------|-------------------------|------------|
| Protein, mg/dl |            |                         |            |
| Placebo        | 67.6 ± 4.2 | 64.4 ± 5.5              | 68.0 ± 5.0 |
| Torcetrapib    | 58.7 ± 5.8 | 53.6 ± 5.7 <sup>c</sup> | 61.0 ± 7.8 |
| Change (%)     | -13 ± 6    | -16 ± 5                 | -13 ± 5    |

---

TRL, triglyceride-rich lipoprotein; QD, once daily; BID, twice daily.

<sup>a</sup>Data are presented as mean ± SEM. Significance for comparison of absolute values with placebo phase was determined using a paired *t*-test, with triglycerides being log-transformed before statistical analysis. Significance for comparison between torcetrapib alone and atorvastatin+torcetrapib cohorts during placebo and torcetrapib 120 mg once daily phases was tested by a two-independent sample *t*-test.

<sup>b</sup>*P* = 0.05; <sup>c</sup>*P* < 0.05; <sup>d</sup>*P* < 0.01; <sup>e</sup>*P* < 0.001, for comparison with the placebo phase.

<sup>f</sup>*P* < 0.05; <sup>g</sup>*P* < 0.01, for comparison with the torcetrapib 120 mg QD cohort.

**SUPPLEMENTAL TABLE 6. Effects of torcetrapib on IDL composition<sup>a</sup>**

| Parameter and Study Phase | Torcetrapib Alone      |                        | Atorvastatin + Torcetrapib |
|---------------------------|------------------------|------------------------|----------------------------|
|                           | 120 mg QD<br>(n = 8)   | 120 mg BID<br>(n = 6)  | 120 mg QD<br>(n = 7)       |
| Total cholesterol, mg/dl  |                        |                        |                            |
| Placebo                   | 6.1 ± 1.3              | 7.2 ± 1.6              | 3.3 ± 0.5                  |
| Torcetrapib               | 2.4 ± 0.4 <sup>b</sup> | 1.8 ± 0.1 <sup>b</sup> | 1.7 ± 0.1 <sup>b</sup>     |
| Change (%)                | -50 ± 10               | -66 ± 9                | -41 ± 7                    |
| Free cholesterol, mg/dl   |                        |                        |                            |
| Placebo                   | 2.0 ± 0.3              | 2.3 ± 0.4              | 1.3 ± 0.2                  |
| Torcetrapib               | 0.9 ± 0.1 <sup>b</sup> | 0.6 ± 0.1 <sup>c</sup> | 0.7 ± 0.1 <sup>b</sup>     |
| Change (%)                | -45 ± 10               | -71 ± 5                | -43 ± 6                    |
| Cholesteryl ester, mg/dl  |                        |                        |                            |
| Placebo                   | 6.8 ± 1.7              | 8.2 ± 2.0              | 2.5 ± 0.7 <sup>d</sup>     |
| Torcetrapib               | 2.4 ± 0.6 <sup>b</sup> | 2.0 ± 0.2 <sup>b</sup> | 1.3 ± 0.3 <sup>b</sup>     |
| Change (%)                | -56 ± 9                | -60 ± 16               | -39 ± 11                   |
| Triglycerides, mg/dl      |                        |                        |                            |
| Placebo                   | 13.8 ± 1.0             | 14.6 ± 1.0             | 14.2 ± 1.1                 |
| Torcetrapib               | 14.6 ± 2.8             | 12.1 ± 0.9             | 12.4 ± 1.2                 |
| Change (%)                | 10 ± 26                | -15 ± 10               | -11 ± 8                    |
| Phospholipid, mg/dl       |                        |                        |                            |
| Placebo                   | 4.8 ± 0.9              | 5.4 ± 1.2              | 2.4 ± 0.3 <sup>d</sup>     |
| Torcetrapib               | 2.1 ± 0.4 <sup>b</sup> | 1.6 ± 0.4 <sup>b</sup> | 1.3 ± 0.2 <sup>c</sup>     |
| Change (%)                | -46 ± 13               | -53 ± 19               | -47 ± 8                    |

|                |            |                         |                         |
|----------------|------------|-------------------------|-------------------------|
| Protein, mg/dl |            |                         |                         |
| Placebo        | 20.0 ± 3.9 | 16.5 ± 1.5              | 35.6 ± 5.3 <sup>d</sup> |
| Torcetrapib    | 18.4 ± 4.9 | 12.7 ± 1.0 <sup>b</sup> | 33.8 ± 5.5 <sup>d</sup> |
| Change (%)     | -11 ± 7    | -21 ± 6                 | -6 ± 3                  |

---

IDL, intermediate density lipoprotein; QD, once daily; BID, twice daily.

<sup>a</sup>Data are presented as mean ± SEM. Significance for comparison of absolute values with placebo phase was determined using a paired *t*-test, with triglycerides being log-transformed before statistical analysis. Significance for comparison between torcetrapib alone and atorvastatin+torcetrapib cohorts during placebo and torcetrapib 120 mg once daily phases was tested by a two-independent sample *t*-test.

<sup>b</sup>*P* < 0.05; <sup>c</sup>*P* < 0.01, for comparison with the placebo phase.

<sup>d</sup>*P* < 0.05, for comparison with the torcetrapib 120 mg QD cohort.

**SUPPLEMENTAL TABLE 7. Effects of torcetrapib on LDL composition<sup>a</sup>**

| Parameter and Study Phase | Torcetrapib Alone    |                         | Atorvastatin + Torcetrapib |
|---------------------------|----------------------|-------------------------|----------------------------|
|                           | 120 mg QD<br>(n = 8) | 120 mg BID<br>(n = 6)   | 120 mg QD<br>(n = 9)       |
| Total cholesterol, mg/dl  |                      |                         |                            |
| Placebo                   | 72.0 ± 7.4           | 78.6 ± 7.4              | 62.8 ± 9.0                 |
| Torcetrapib               | 68.5 ± 5.0           | 58.8 ± 6.9 <sup>c</sup> | 46.7 ± 5.3 <sup>c,f</sup>  |
| Change (%)                | 0 ± 9                | -24 ± 8                 | -22 ± 5                    |
| Free cholesterol, mg/dl   |                      |                         |                            |
| Placebo                   | 20.0 ± 2.2           | 21.4 ± 2.1              | 17.0 ± 2.4                 |
| Torcetrapib               | 17.9 ± 1.4           | 15.9 ± 1.6              | 13.3 ± 1.4 <sup>c,e</sup>  |
| Change (%)                | -6 ± 7               | -23 ± 9                 | -17 ± 6                    |
| Cholesteryl ester, mg/dl  |                      |                         |                            |
| Placebo                   | 87.3 ± 9.1           | 96.0 ± 9.7              | 77.0 ± 11.1                |
| Torcetrapib               | 84.9 ± 6.1           | 74.9 ± 9.8 <sup>c</sup> | 56.1 ± 6.6 <sup>d,f</sup>  |
| Change (%)                | 2 ± 9                | -21 ± 7                 | -24 ± 5                    |
| Triglycerides, mg/dl      |                      |                         |                            |
| Placebo                   | 21.2 ± 1.5           | 24.0 ± 1.8              | 22.1 ± 1.7                 |
| Torcetrapib               | 20.6 ± 3.1           | 17.6 ± 1.8 <sup>b</sup> | 20.9 ± 2.8                 |
| Change (%)                | -3 ± 13              | -25 ± 11                | -5 ± 10                    |
| Phospholipid, mg/dl       |                      |                         |                            |
| Placebo                   | 48.0 ± 4.9           | 50.4 ± 4.8              | 41.5 ± 5.8                 |
| Torcetrapib               | 42.5 ± 2.9           | 39.8 ± 4.0              | 31.3 ± 3.3 <sup>d,e</sup>  |
| Change (%)                | -8 ± 8               | -18 ± 9                 | -21 ± 4                    |

|                |                          |                          |                           |
|----------------|--------------------------|--------------------------|---------------------------|
| Protein, mg/dl |                          |                          |                           |
| Placebo        | 120.0 ± 4.7              | 123.6 ± 5.3              | 86.9 ± 6.7 <sup>f</sup>   |
| Torcetrapib    | 106.0 ± 4.3 <sup>d</sup> | 106.6 ± 5.9 <sup>c</sup> | 73.5 ± 5.8 <sup>d,g</sup> |
| Change (%)     | -12 ± 2                  | -14 ± 4                  | -15 ± 3                   |

---

QD, once daily; BID, twice daily.

<sup>a</sup>Data are presented as mean ± SEM. Significance for comparison of absolute values with placebo phase was determined using a paired *t*-test, with triglycerides being log-transformed before statistical analysis. Significance for comparison between torcetrapib alone and atorvastatin+torcetrapib cohorts during placebo and torcetrapib 120 mg once daily phases was tested by a two-independent sample *t*-test.

<sup>b</sup>*P* = 0.05; <sup>c</sup>*P* < 0.05; <sup>d</sup>*P* < 0.01, for comparison with the placebo phase.

<sup>e</sup>*P* < 0.05; <sup>f</sup>*P* < 0.01; <sup>g</sup>*P* < 0.001, for comparison with the torcetrapib 120 mg QD cohort.

**SUPPLEMENTAL TABLE 8. Effects of torcetrapib on HDL composition<sup>a</sup>**

| Parameter and Study Phase | Torcetrapib Alone       |                         | Atorvastatin + Torcetrapib |
|---------------------------|-------------------------|-------------------------|----------------------------|
|                           | 120 mg QD<br>(n = 9)    | 120 mg BID<br>(n = 6)   | 120 mg QD<br>(n = 9)       |
| Total cholesterol, mg/dl  |                         |                         |                            |
| Placebo                   | 20.1 ± 1.8              | 21.3 ± 1.4              | 22.1 ± 1.0                 |
| Torcetrapib               | 32.2 ± 3.0 <sup>d</sup> | 46.3 ± 3.4 <sup>d</sup> | 33.4 ± 1.6 <sup>d</sup>    |
| Change (%)                | 63 ± 10                 | 119 ± 12                | 53 ± 9                     |
| Free cholesterol, mg/dl   |                         |                         |                            |
| Placebo                   | 4.6 ± 0.5               | 4.6 ± 0.5               | 5.3 ± 0.3                  |
| Torcetrapib               | 6.5 ± 0.7 <sup>c</sup>  | 9.4 ± 1.1 <sup>d</sup>  | 7.4 ± 0.6 <sup>b</sup>     |
| Change (%)                | 40 ± 8                  | 106 ± 14                | 44 ± 14                    |
| Cholesteryl ester, mg/dl  |                         |                         |                            |
| Placebo                   | 26.0 ± 2.3              | 28.0 ± 1.8              | 28.2 ± 1.3                 |
| Torcetrapib               | 43.2 ± 3.9 <sup>d</sup> | 62.0 ± 4.1 <sup>d</sup> | 43.6 ± 2.3 <sup>d</sup>    |
| Change (%)                | 72 ± 14                 | 123 ± 14                | 56 ± 9                     |
| Triglycerides, mg/dl      |                         |                         |                            |
| Placebo                   | 21.8 ± 1.6              | 18.9 ± 0.7              | 17.0 ± 1.5 <sup>e</sup>    |
| Torcetrapib               | 13.3 ± 1.1 <sup>c</sup> | 15.1 ± 1.6              | 14.7 ± 1.8                 |
| Change (%)                | -36 ± 7                 | -20 ± 9                 | -8 ± 13                    |
| Phospholipid, mg/dl       |                         |                         |                            |
| Placebo                   | 38.6 ± 2.1              | 39.4 ± 1.9              | 40.8 ± 0.9                 |
| Torcetrapib               | 52.2 ± 3.5 <sup>c</sup> | 74.2 ± 4.5 <sup>d</sup> | 53.5 ± 2.0 <sup>d</sup>    |
| Change (%)                | 36 ± 8                  | 88 ± 7                  | 32 ± 6                     |

|                |                          |                           |             |
|----------------|--------------------------|---------------------------|-------------|
| Protein, mg/dl |                          |                           |             |
| Placebo        | 141.2 ± 3.2              | 144.1 ± 3.6               | 139.4 ± 4.9 |
| Torcetrapib    | 161.6 ± 8.6 <sup>b</sup> | 204.4 ± 13.8 <sup>c</sup> | 153.5 ± 8.5 |
| Change (%)     | 14 ± 6                   | 42 ± 11                   | 10 ± 6      |

---

QD, once daily; BID, twice daily.

<sup>a</sup>Data are presented as mean ± SEM. Significance for comparison of absolute values with placebo phase was determined using a paired *t*-test, with triglycerides being log-transformed before statistical analysis. Significance for comparison between torcetrapib alone and atorvastatin+torcetrapib cohorts during placebo and torcetrapib 120 mg once daily phases was tested by a two-independent sample *t*-test.

<sup>b</sup>*P* < 0.05; <sup>c</sup>*P* < 0.01; <sup>d</sup>*P* < 0.001, for comparison with the placebo phase.

<sup>e</sup>*P* < 0.05, for comparison with the torcetrapib 120 mg QD cohort.

**SUPPLEMENTAL TABLE 9. Effects of torcetrapib on precursors of bile acid and cholesterol synthesis and fecal bile acid and neutral sterol content<sup>a</sup>**

| Parameter and Study Phase                          | Torcetrapib Alone                  |                       | Atorvastatin +<br>Torcetrapib |
|----------------------------------------------------|------------------------------------|-----------------------|-------------------------------|
|                                                    | 120 mg QD<br>(n = 10) <sup>b</sup> | 120 mg BID<br>(n = 6) | 120 mg QD<br>(n = 9)          |
| Serum 7 $\alpha$ -hydroxy-4-cholesten-3-one, ng/ml |                                    |                       |                               |
| Placebo                                            | 38 $\pm$ 29                        | 29 $\pm$ 18           | 23 $\pm$ 20                   |
| Torcetrapib                                        | 36 $\pm$ 27                        | 38 $\pm$ 22           | 22 $\pm$ 13                   |
| Change (%)                                         | 17 $\pm$ 52                        | 35 $\pm$ 49           | 16 $\pm$ 66                   |
| Serum lathosterol, $\mu$ g/ml                      |                                    |                       |                               |
| Placebo                                            | 2.0 $\pm$ 0.8                      | 1.7 $\pm$ 0.5         | 0.6 $\pm$ 0.3 <sup>f</sup>    |
| Torcetrapib                                        | 2.4 $\pm$ 0.9                      | 2.3 $\pm$ 1.0         | 0.5 $\pm$ 0.2 <sup>f</sup>    |
| Change (%)                                         | 16 $\pm$ 20                        | 32 $\pm$ 43           | -18 $\pm$ 28                  |
| Fecal bile acids, mg/mg plant sterols              |                                    |                       |                               |
| Placebo                                            | 2.4 $\pm$ 1.5                      | 1.9 $\pm$ 0.7         | 1.4 $\pm$ 0.4                 |
| Torcetrapib                                        | 2.2 $\pm$ 1.2                      | 2.2 $\pm$ 1.1         | 1.2 $\pm$ 0.4 <sup>c,d</sup>  |
| Change (%)                                         | 4 $\pm$ 50                         | 13 $\pm$ 46           | -16 $\pm$ 20                  |
| Fecal neutral sterols, mg/mg plant sterols         |                                    |                       |                               |
| Placebo                                            | 3.3 $\pm$ 1.0                      | 2.9 $\pm$ 0.5         | 1.9 $\pm$ 0.7 <sup>e</sup>    |
| Torcetrapib                                        | 3.3 $\pm$ 0.6                      | 2.9 $\pm$ 1.0         | 1.7 $\pm$ 0.4 <sup>f</sup>    |
| Change (%)                                         | 5 $\pm$ 28                         | -1 $\pm$ 32           | -8 $\pm$ 22                   |

QD, once daily; BID, twice daily.

<sup>a</sup>Data are presented as mean  $\pm$  SD. Significance for comparison of absolute values with placebo phase was determined using a paired *t*-test. Significance for comparison between torcetrapib



alone and atorvastatin+torcetrapib cohorts during placebo and torcetrapib 120 mg once daily phases was tested by a two-independent sample *t*-test.

<sup>b</sup>Torcetrapib alone 120 mg QD cohort includes subject with unsatisfactory apoB kinetic data (see Methods).

<sup>c</sup>*P* < 0.04, for comparison with the placebo phase.

<sup>d</sup>*P* < 0.05; <sup>e</sup>*P* < 0.01; <sup>f</sup>*P* < 0.0001, for comparison with torcetrapib 102 mg QD cohort.
